# Supplementary material for: Convenient Solid-Phase Attachment of Small-Molecule Ligands to Oligonucleotides via a Biodegradable Acid-Labile P-N-Bond
Source: MDPI journal article supplement (doi:10.3390/molecules28041904), 2023-02-16
Supplement: s1 [file s1]

## Article

# Convenient Solid-Phase Attachment of Small-Molecule Ligands to Oligonucleotides via a Biodegradable Acid-Labile P-N-Bond

Nadezhda O. Kropacheva <sup>1,2</sup>, Arseniy A. Golyshkin <sup>2</sup>, Mariya A. Vorobyeva <sup>1</sup> and Mariya I. Meschaninova <sup>1,\*</sup>

<sup>1</sup> Institute of Chemical Biology and Fundamental Medicine, Siberian Branch, Russian Academy of Sciences, Novosibirsk 630090, Russia; n.kropacheva1@g.nsu.ru (N.O.K.); kuzn@niboch.nsc.ru (M.A.V.)

<sup>2</sup> Department of Natural Sciences, Novosibirsk State University, Novosibirsk 630090, Russia; a.golyshkin@g.nsu.ru

\* Correspondence: mesch@niboch.nsc.ru; Tel.: +7-383-363-5129

## Content

|                                                                                                                                                                                 | Page       |
|---------------------------------------------------------------------------------------------------------------------------------------------------------------------------------|------------|
| <b>Table S1.</b> The amino ligands used for solid-phase attachment to oligonucleotides and selected optimal solvents for this reaction                                          | <b>S2</b>  |
| <b>Figure S1.</b> Electrophoretic analysis of reaction mixtures upon solid-phase conjugation                                                                                    | <b>S3</b>  |
| <b>Figure S2.</b> Functionalization of the 5'-amino modified oligonucleotide ( <b>7</b> ) with Biotin <i>N</i> -hydroxysuccinimide ester                                        | <b>S4</b>  |
| <b>Figure S3.</b> Attachment of FAM or $\alpha$ -GalNAc azides to the 5'-alkyne-modified oligonucleotide ( <b>12</b> ) or ( <b>17</b> ) using "click"-chemistry reaction        | <b>S5</b>  |
| <b>Table S2.</b> Representative ESI or MALDI-TOF mass spectra of the 5'-conjugates of oligonucleotides                                                                          | <b>S6</b>  |
| <b>Table S3.</b> <sup>1</sup> H-NMR spectra of amino containing ligands                                                                                                         | <b>S14</b> |
| <b>Figure S4.</b> Full-size images of electropherograms after PAGE analysis and Stains-all staining for 5'-phosphorylated oligonucleotides and their conjugates ( <b>1-18</b> ) | <b>S16</b> |
| <b>Experimental Section S1.</b> Automated synthesis of polymer-bound oligonucleotides                                                                                           | <b>S17</b> |
| <b>Table S4.</b> Stability of the P-N-bond within the oligonucleotide conjugates ( <b>14-16, 18</b> ) at different pH values                                                    | <b>S18</b> |

**Table S1.** The amino ligands used for solid-phase attachment to oligonucleotides and selected optimal solvents for this reaction.

| Structure                                                                                                                                                                                       | Solvent                         | Molecular weight | References                             |
|-------------------------------------------------------------------------------------------------------------------------------------------------------------------------------------------------|---------------------------------|------------------|----------------------------------------|
| <b>Pyrenemethylamine</b><br>$(Pyr-CH_2-NH_2)$<br>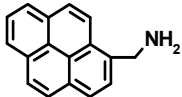                                                              | DMSO                            | 231.29           | Sigma-Aldrich                          |
| <b>1,6-Diaminohexane</b><br>$NH_2-(CH_2)_6-NH_2$                                                                                                                                                | CH <sub>2</sub> Cl <sub>2</sub> | 116.21           | Sigma-Aldrich                          |
| <b>3-Amino-1-propanol</b><br>$HO-(CH_2)_3-NH_2$                                                                                                                                                 | THF                             | 75.11            | Sigma-Aldrich                          |
| <b>Propargylamine</b><br>$HC\equiv C-CH_2-NH_2$                                                                                                                                                 | THF                             | 55.08            | Sigma-Aldrich                          |
| <b>Oleylamine</b><br>$(Oleyl-NH_2)$<br>                                                                        | CH <sub>2</sub> Cl <sub>2</sub> | 267.49           | Sigma-Aldrich                          |
| <b>Cholesteryl-6-aminohexylcarbamate (I)</b><br>$(Chol-C(O)-L_6-NH_2, \text{ where } L_6: -NH(CH_2)_6-)$<br> | CH <sub>2</sub> Cl <sub>2</sub> | 528.85           | See Materials and Methods, Section 4.4 |
| <b>N-(6-Aminohexyl)-4-methoxybenzamide (II)</b><br>$(MB-L_6-NH_2, \text{ where } L_6: -NH(CH_2)_6-)$<br>     | CH <sub>2</sub> Cl <sub>2</sub> | 250.36           | See Materials and Methods, Section 4.4 |

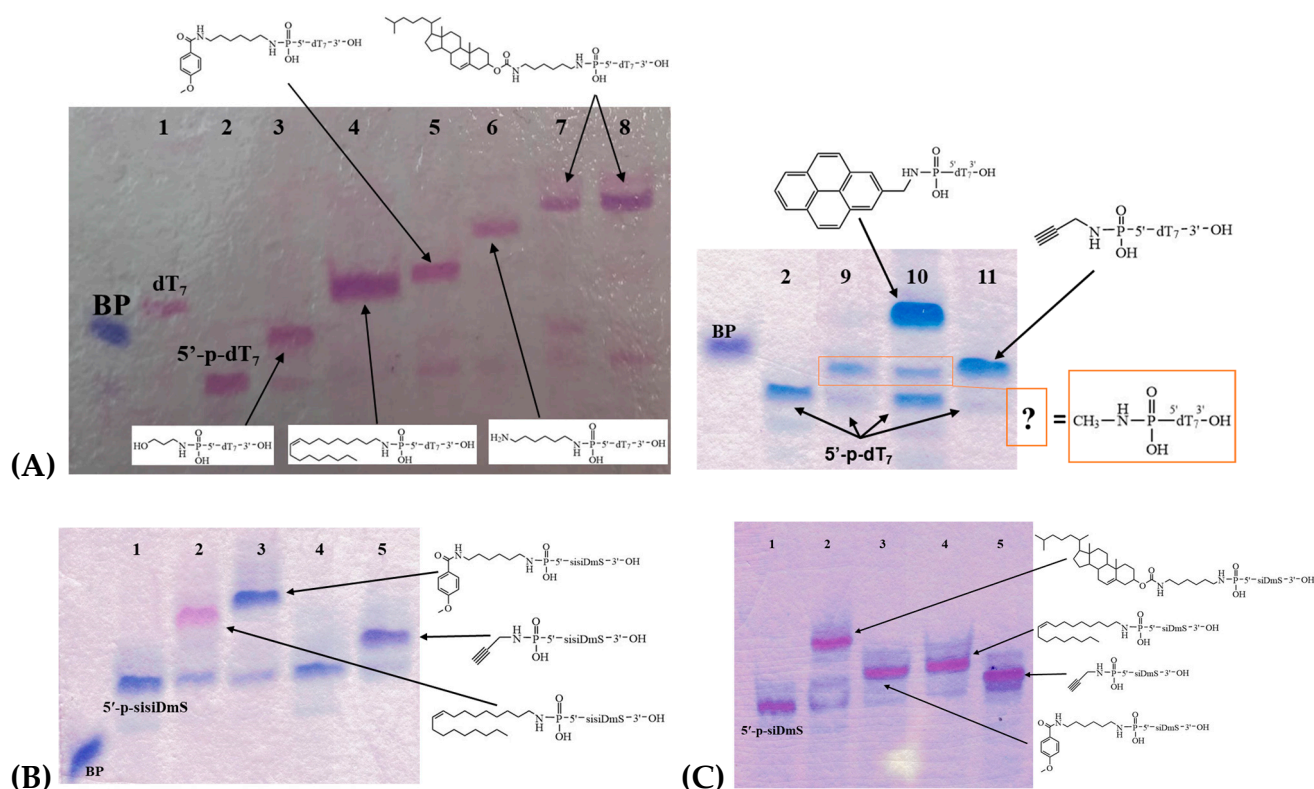

**Figure S1.** Electrophoretic analysis of reaction mixtures upon solid-phase conjugation. Analysis of reaction mixtures after solid-phase synthesis by PAGE: **(A)** line 1 - dT<sub>7</sub>, line 2 - initial 5'-p-dT<sub>7</sub>, line 3 - HO-(CH<sub>2</sub>)<sub>3</sub>-NH-p-dT<sub>7</sub> (6), line 4 - Oleyl-NH-p-dT<sub>7</sub> (3), line 5 - MB-L<sub>6</sub>-NH-p-dT<sub>7</sub> (1), line 6 - NH<sub>2</sub>-(CH<sub>2</sub>)<sub>6</sub>-NH-p-dT<sub>7</sub> (7), line 7 and 8 - Chol-C(O)-L<sub>6</sub>-NH-p-dT<sub>7</sub> (2), line 9 - CH<sub>3</sub>-NH-p-dT<sub>7</sub> (9), line 10 - Pyr-CH<sub>2</sub>-NH-p-dT<sub>7</sub> (5); line 11 - CH≡C-CH<sub>2</sub>-NH-p-dT<sub>7</sub> (4); **(B)** line 1 and 4 - initial 5'-p-siDmS, line 2 - Oleyl-NH-p-siDmS (11), line 3 - MB-L<sub>6</sub>-NH-p-siDmS (i), line 5 - CH≡C-CH<sub>2</sub>-NH-p-siDmS (i); **(C)** line 1 - initial 5'-p-siDmS, line 2 - Chol-C(O)-L<sub>6</sub>-NH-p-siDmS (15), line 3 - MB-L<sub>6</sub>-NH-p-siDmS (i), line 4 - Oleyl-NH-p-siDmS (16), line 5 - CH≡C-CH<sub>2</sub>-NH-p-siDmS (17). Conditions: 15% denaturing PAAG (7M urea, acrylamide/*N,N'*-methylene bis-acrylamide (19/1)) in TBE buffer. Gel stained with "Stains-all". BP – bromophenol blue. Chol-C(O)-L<sub>6</sub>-NH-, cholesteryl-6-aminoheptylcarbamate residue; Oleyl-NH-, oleylamine residue; Pyr-CH<sub>2</sub>-NH-, pyrenemethylamine residue; MB-L<sub>6</sub>-NH-, *N*-(6-aminoheptyl)-4-methoxybenzamide residue; NH<sub>2</sub>-(CH<sub>2</sub>)<sub>6</sub>-NH-, 1,6-diaminohexane residue; HO-(CH<sub>2</sub>)<sub>3</sub>-NH-, 3-amino-1-propanol residue; CH≡C-CH<sub>2</sub>-NH-, propargylamine residue; -p-, -P(O)(OH)-; L<sub>6</sub> -, -NH(CH<sub>2</sub>)<sub>6</sub>-; dT<sub>7</sub> = 5'-d(TTTTTT); 5'-p-dT<sub>7</sub> = 5'-p-d(TTTTTT); 5'-p-siDmS = 5'-p-G<sup>m</sup>G<sup>m</sup>C<sup>m</sup>U<sup>m</sup>U<sup>m</sup>G<sup>m</sup>A<sup>m</sup>C<sup>m</sup>A<sup>m</sup>; 5'-p-siDmS = 5'-p-GGCUUGACAAGUUGUAUAUGG<sup>m</sup> (d(N), deoxyribonucleotide; N<sup>m</sup>, 2'-O-methylribonucleotide; N, ribonucleotide). Full-size images of electropherograms after analyses of reaction mixtures are given in Figure S4.

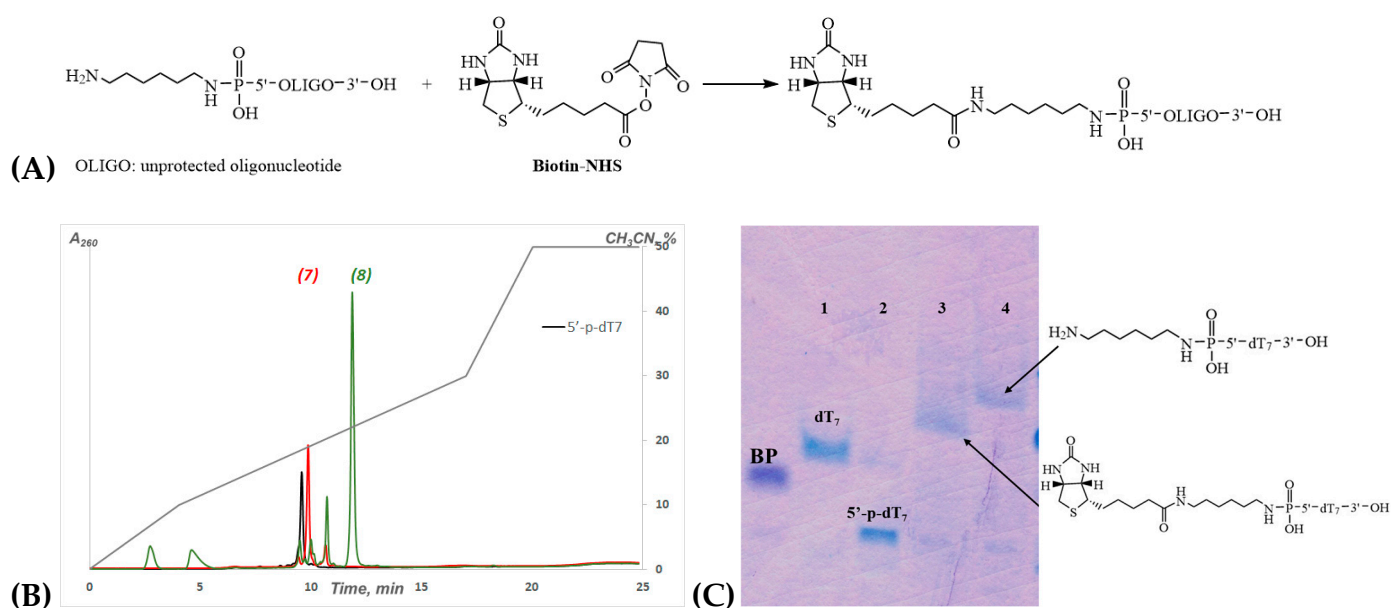

**Figure S2.** Functionalization of the 5'-amino modified oligonucleotide (7) with Biotin N-hydroxysuccinimide ester. **(A)** Scheme of the synthesis of Biotin-conjugate of 5'-p-dT<sub>7</sub> (8). **(B)** RP HPLC analysis of reaction mixtures of initial oligonucleotide 5'-p-dT<sub>7</sub> and conjugates (7) and (8). The degree of conversion of (7) to (8) was 82%. Conditions: Alphachrom A-02 high performance liquid chromatograph (EcoNova, Novosibirsk, Russia), ProntoSil-120-5-C18 AQ (75×2.0 mm, 5.0 μm) column, gradient elution from 0 to 50% (25 min) of acetonitrile in 0.02 M triethylammonium acetate buffer, pH 7.0, flow rate 100 μL per min, detection at 260 nm. **(C)** Analysis of reaction mixtures of 5'-p-dT<sub>7</sub> and conjugates (7) and (8) by PAGE: line 1 - deblocked reaction mixtures of dT<sub>7</sub> oligonucleotide; line 2 - deblocked reaction mixtures of 5'-p-dT<sub>7</sub> oligonucleotide; line 3 - reaction mixture after Biotin-NHS attachment to derivative (7) in solution to obtain conjugate (8); line 4 - deblocked reaction mixture after solid-phase attachment of 1,6-diaminohexane to the activated 5'-p-dT<sub>7</sub> to obtain derivative (7). Conditions: 15% denaturing PAAG (7M urea, acrylamide/*N,N'*-methylene bisacrylamide (19/1)) in TBE buffer. Gel stained with "Stains-all". BP – bromophenol blue. 5'-p-dT<sub>7</sub> = 5'-p-d(TTTTTT); -p-, -P(O)(OH)-; d(N), deoxyribonucleotide. Full-size images of electropherograms after analyses of reaction mixtures are given in Figure S4.



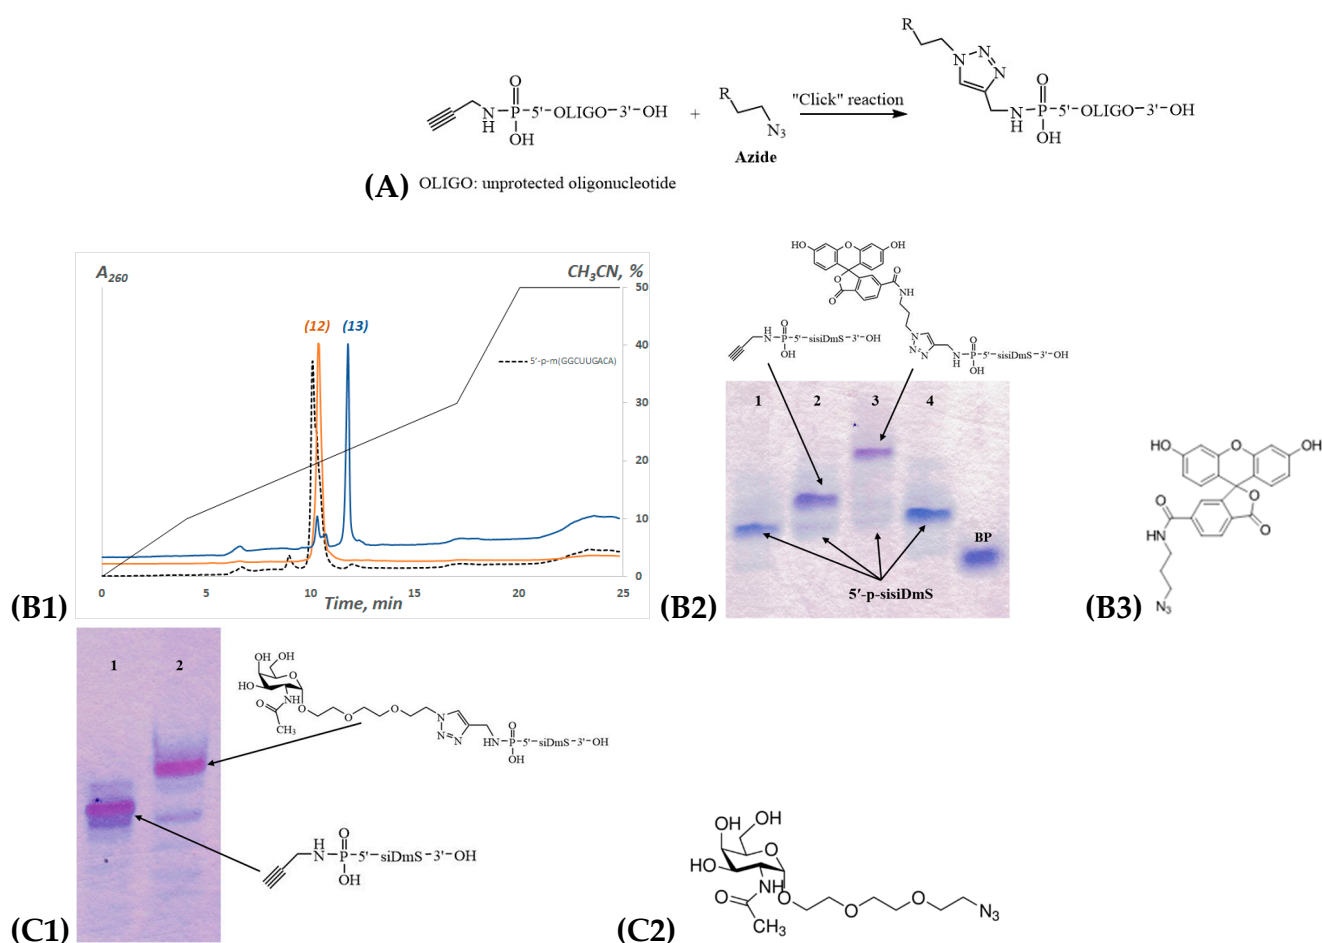

**Figure S3.** Attachment of FAM or  $\alpha$ -GalNAc azides to the 5'-alkyne-modified oligonucleotide (12) or (17) using "click"-chemistry reaction. **(A)** Scheme of the synthesis of conjugates (13) and (18) using "click"-reaction of with 5'-propargylamine-modified oligonucleotides (12) and (17), respectively. **(B1)** Reverse phase-HPLC (RP-HPLC) analysis of reaction mixtures of the 5'-p-siDmS and conjugates (12) and (13). The degree of conversion of (12) to (13) was 87%. Conditions: Alphachrom A-02 high performance liquid chromatograph (EcoNova, Novosibirsk, Russia), ProntoSil-120-5-C18 AQ (75×2.0 mm, 5.0  $\mu$ m) column, gradient elution from 0 to 50% (25 min) of acetonitrile in 0.02 M triethylammonium acetate buffer, pH 7.0, flow rate 100  $\mu$ L per min, detection at 260 nm. **(B2)** Analysis of reaction mixtures of 5'-p-siDmS and conjugates (12) and (13) by PAGE: line 1 and 4 - deblocked reaction mixtures of initial 5'-p-siDmS oligonucleotide; line 2 - deblocked reaction mixture after solid-phase attachment of propargylamine to the activated 5'-p-siDmS to obtain derivative (12); line 3 - reaction mixture after FAM azide attachment to derivative (12) *via* "click"-chemistry in solution to obtain conjugate (13). **(B3)** Structure of FAM azide. **(C1)** Analysis of reaction mixtures of 5'-p-siDmS and conjugates (17) and (18) by PAGE: line 1 - deblocked reaction mixtures of initial 5'-p-siDmS oligonucleotide; line 2 - deblocked reaction mixture after solid-phase attachment of propargylamine to the activated 5'-p-siDmS to obtain derivative (17); line 3 - reaction mixture after  $\alpha$ -GalNAc-PEG3 azide attachment to derivative (17) *via* "click"-chemistry in solution to obtain conjugate (18). **(C2)** Structure of  $\alpha$ -GalNAc-PEG3-azide. Conditions of PAGE: 15% denaturing PAAG (7M urea, acrylamide/*N,N'*-methylene bis-acrylamide (19/1)) in TBE buffer. Gel stained with "Stains-all". BP - bromophenol blue. 5'-p-siDmS = 5'-p-G<sup>m</sup>G<sup>m</sup>C<sup>m</sup>U<sup>m</sup>U<sup>m</sup>G<sup>m</sup>A<sup>m</sup>C<sup>m</sup>A<sup>m</sup>; 5'-p-siDmS = 5'-p-GGCUUGACAAGUUGUAUAUGG<sup>m</sup>; -p-, -P(O)(OH)-; N, ribonucleotide; N<sup>m</sup>, 2'-O-methylribonucleotide. Full-size images of electropherograms after analyses of reaction mixtures are given in Figure S4.

**Table S2.** Representative ESI or MALDI-TOF mass spectra of the 5'-conjugates of oligonucleotides.**(1) MB-L<sub>6</sub>-NH-p-d(TTTTTT)**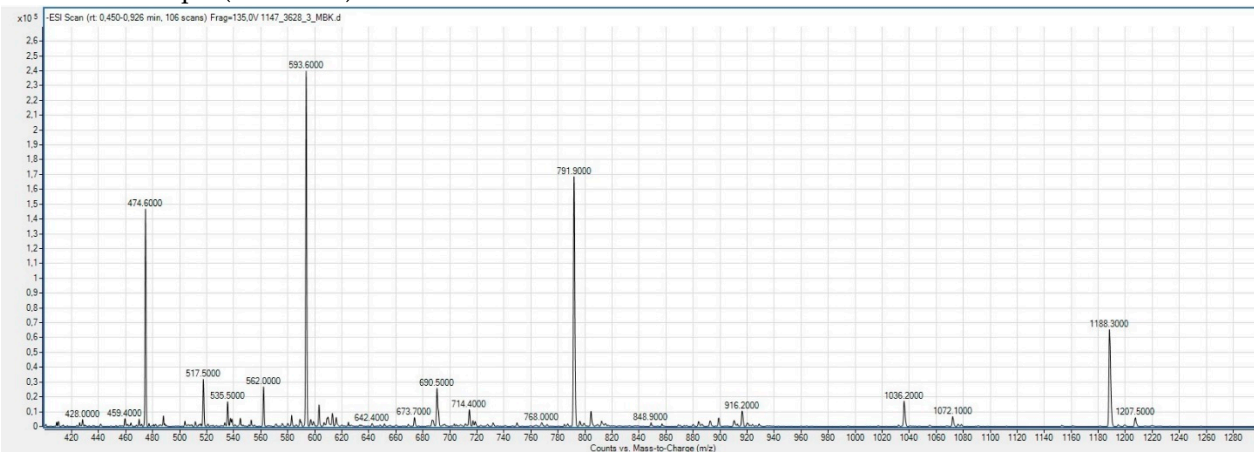

[H5] / 474.6      2378.0 →  
 [H4] / 593.6      2378.4 →  
 [H3] / 791.9      2378.8 →  
 [H2] / 1188.3    2378.6 →

M 2378.0  
 M 2378.4  
 M 2378.8  
 M 2378.6  
 M<sub>found</sub> 2378.5

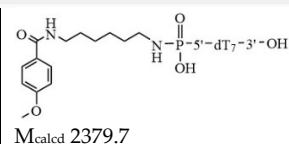**(2) Chol-C(O)-L<sub>6</sub>-NH-p-d(TTTTTT)**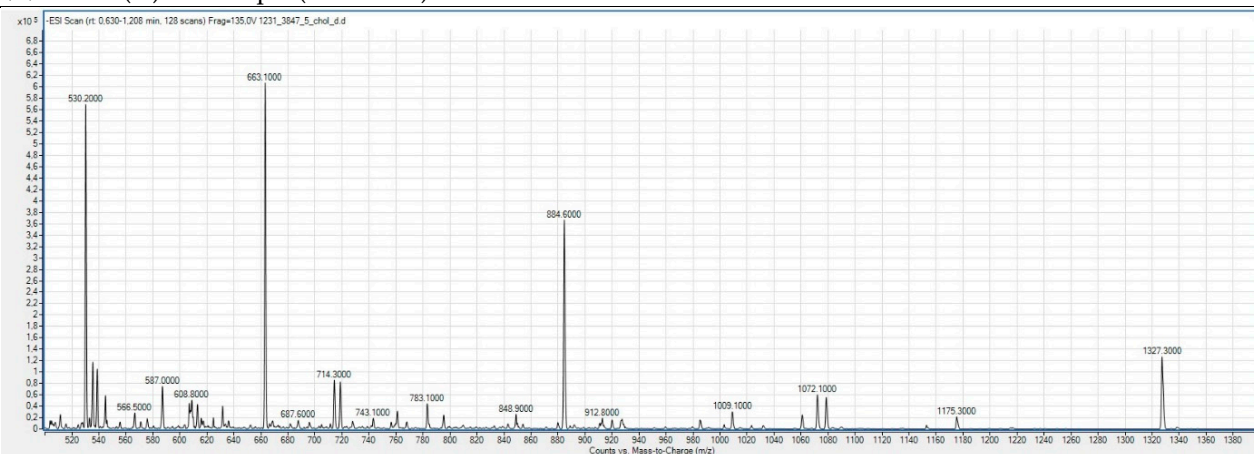

[H5] / 530.2      2656.0 →  
 [H4] / 663.1      2656.4 →  
 [H3] / 884.6      2656.8 →  
 [H2] / 1327.3    2656.6 →

M 2656.0  
 M 2656.4  
 M 2656.8  
 M 2656.6  
 M<sub>found</sub> 2656.5

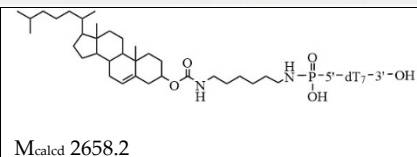

**(3) Oleyl-NH-p-d(TTTTTT)**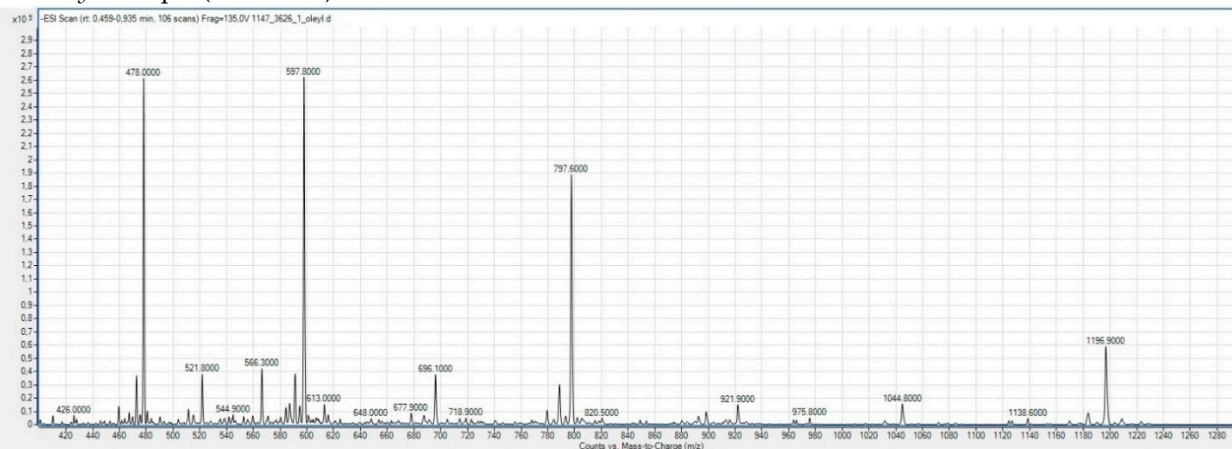

[H5] / 478.0      2395.0 →  
 [H4] / 597.8      2395.2 →  
 [H3] / 797.6      2395.8 →  
 [H2] / 1196.9    2395.8 →

M 2395.0  
 M 2395.2  
 M 2395.8  
 M 2395.8

M<sub>found</sub> 2395.5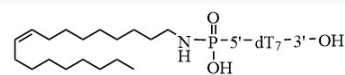M<sub>calcd</sub> 2396.8**(4) CH≡C-CH<sub>2</sub>-NH-p-d(TTTTTT)**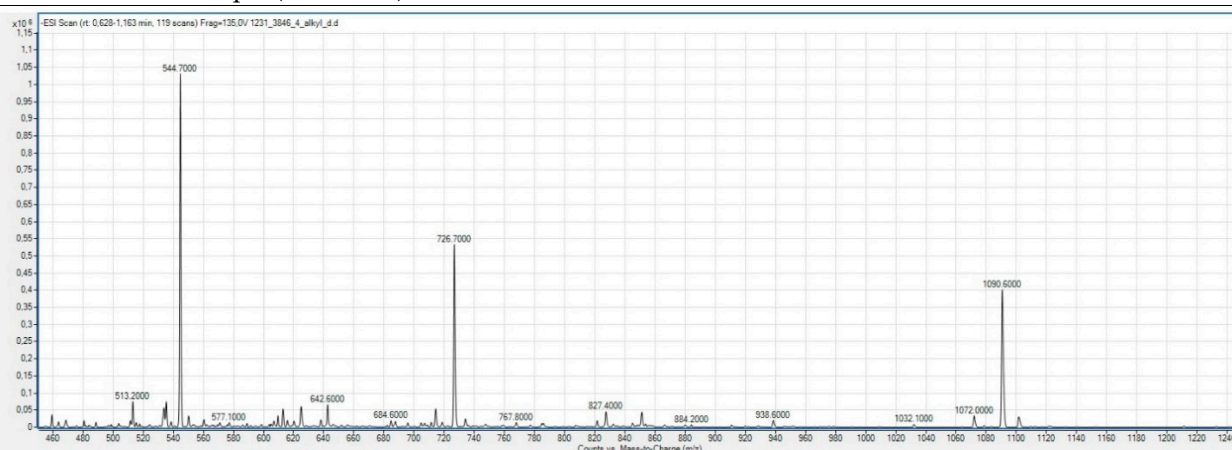

[H4] / 544.7      2182.8 →  
 [H3] / 726.7      2183.1 →  
 [H2] / 1090.6    2183.2 →

M 2182.8  
 M 2183.1  
 M 2183.2

M<sub>found</sub> 2183.0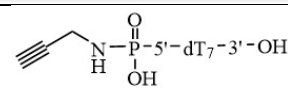M<sub>calcd</sub> 2184.4**(5) Pyr-CH<sub>2</sub>-NH-p-d(TTTTTT)**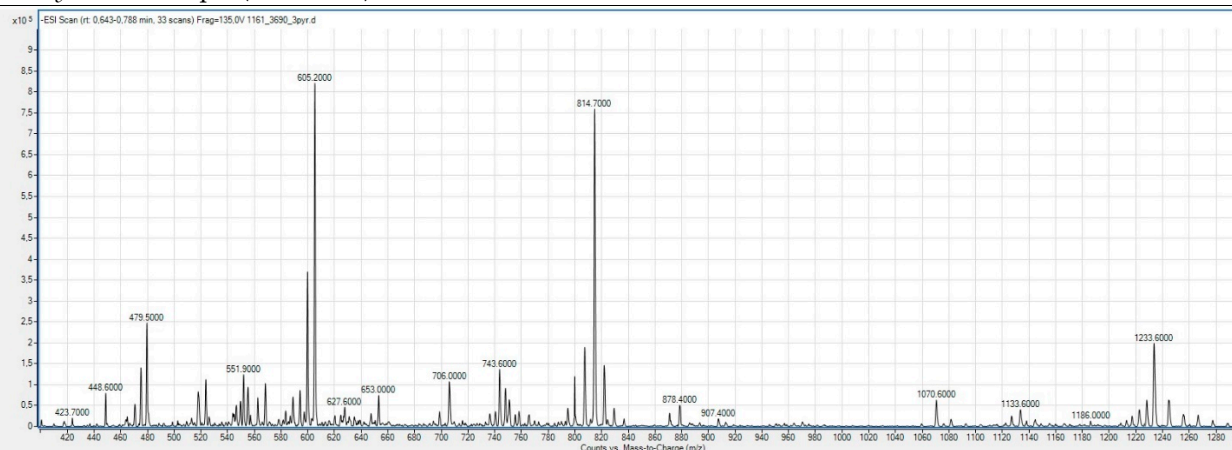

[H5] / 479.5      2402.5 – 2\*23(M<sub>Na+</sub>) + 2\*1(M<sub>H+</sub>) →  
 [H4] / 605.2      2424.8 – 3\*23(M<sub>Na+</sub>) + 3\*1(M<sub>H+</sub>) →  
 [H3] / 814.7      2447.1 – 4\*23(M<sub>Na+</sub>) + 4\*1(M<sub>H+</sub>) →  
 [H2] / 1233.6    2469.2 – 5\*23(M<sub>Na+</sub>) + 5\*1(M<sub>H+</sub>) →

M 2358.5  
 M 2358.8  
 M 2359.1  
 M 2359.2

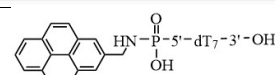

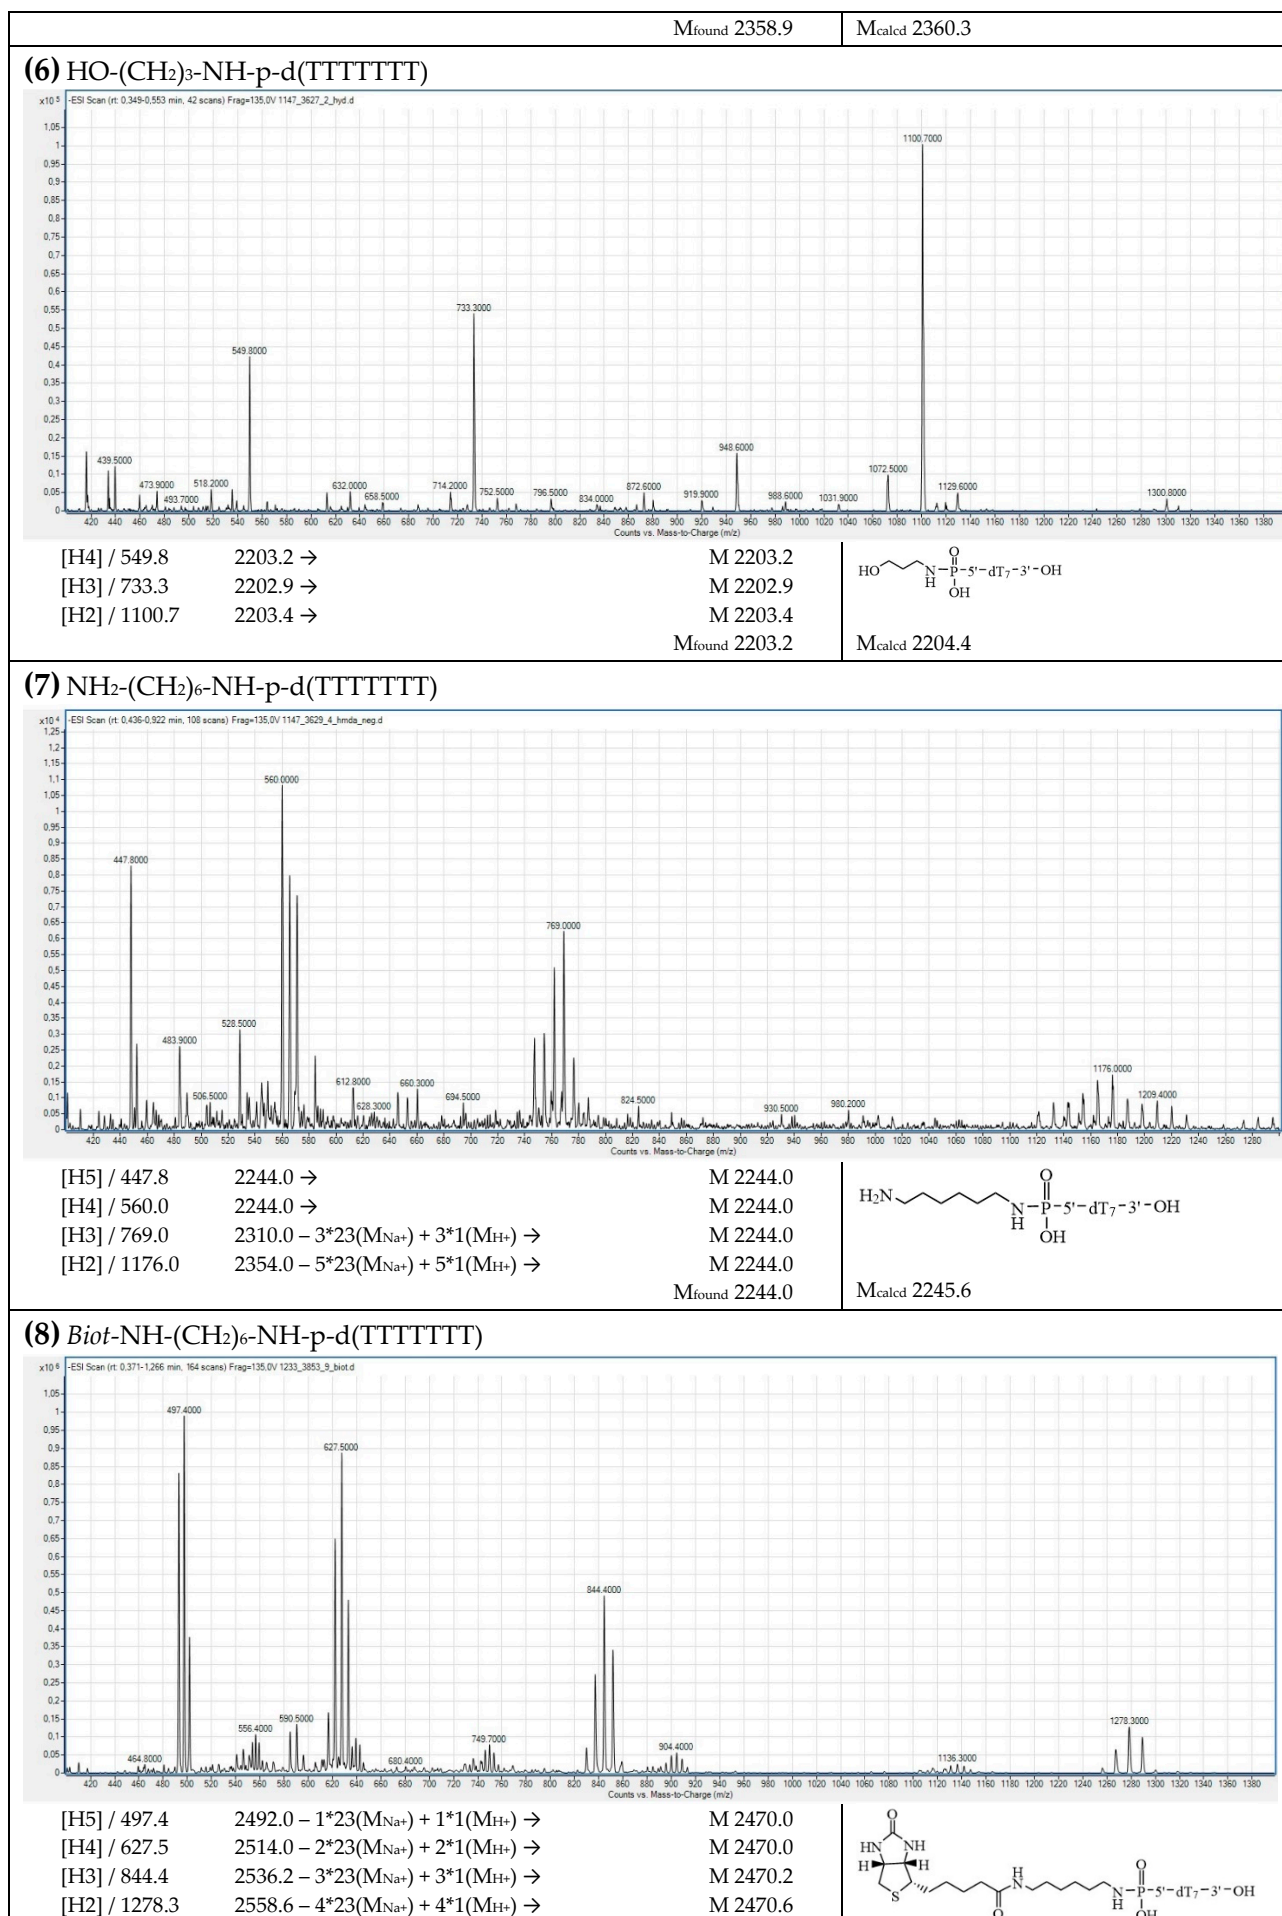



M<sub>found</sub> 2470.2M<sub>calcd</sub> 2471.6**(9) CH<sub>3</sub>-NH-p-d(TTTTTT)**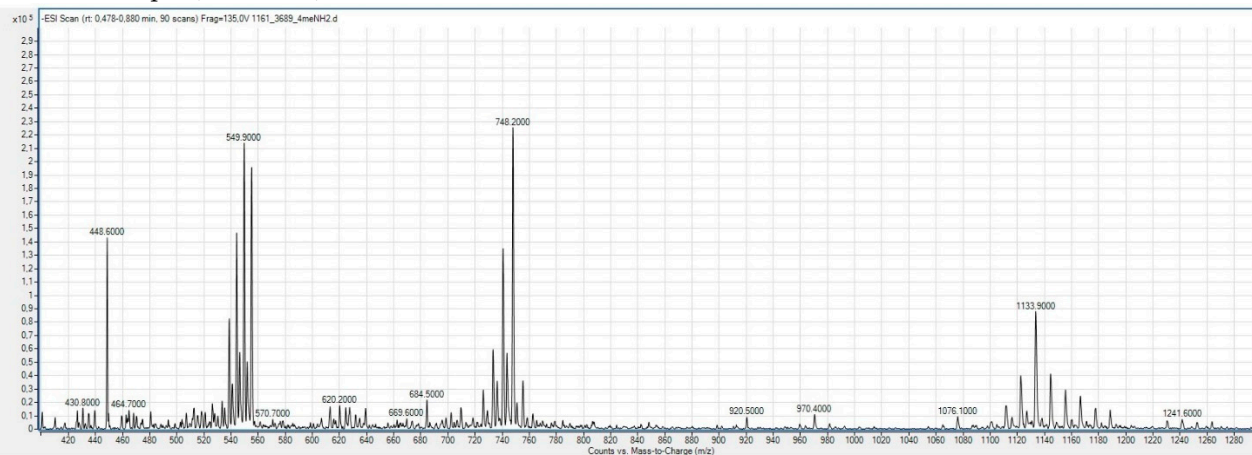

[H4] / 549.9      2203.6 – 2\*23(M<sub>Na+</sub>) + 2\*1(M<sub>H+</sub>) →  
 [H3] / 748.2      2247.6 – 4\*23(M<sub>Na+</sub>) + 4\*1(M<sub>H+</sub>) →  
 [H2] / 1133.9    2269.8 – 5\*23(M<sub>Na+</sub>) + 5\*1(M<sub>H+</sub>) →

M 2159.6

M 2159.6

M 2159.8

M<sub>found</sub> 2159.7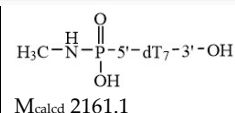M<sub>calcd</sub> 2161.1**(10) Oleyl-NH-p-G<sup>m</sup>G<sup>m</sup>C<sup>m</sup>U<sup>m</sup>U<sup>m</sup>G<sup>m</sup>A<sup>m</sup>C<sup>m</sup>A<sup>m</sup>**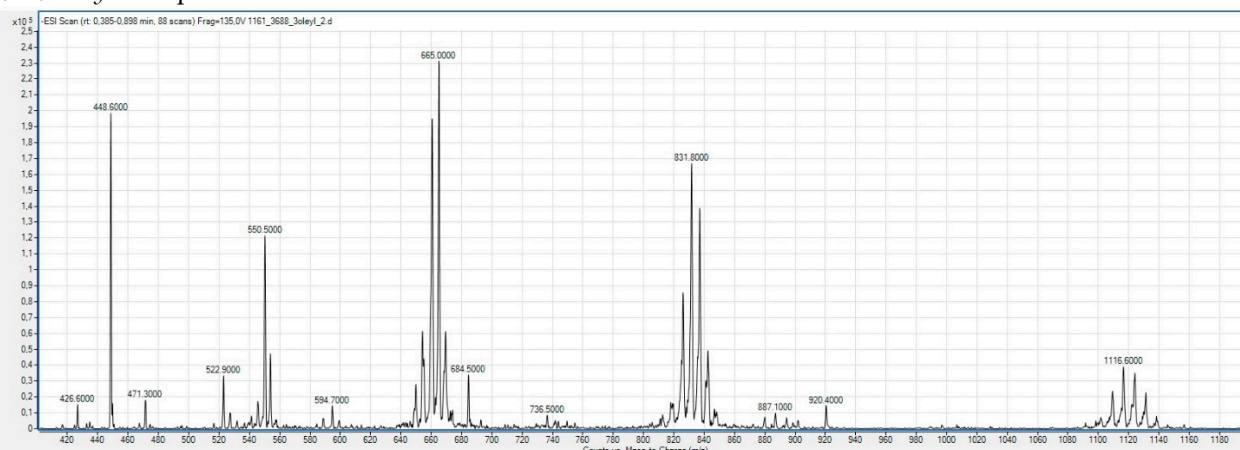

[H6] / 550.5      3309.0 →  
 [H5] / 665.0      3352.8 – 1\*23(M<sub>Na+</sub>) + 1\*1(M<sub>H+</sub>) →  
 [H4] / 831.8      3331.2 – 1\*23(M<sub>Na+</sub>) + 1\*1(M<sub>H+</sub>) →  
 [H3] / 1116.6    3352.8 – 2\*23(M<sub>Na+</sub>) + 2\*1(M<sub>H+</sub>) →

M 3309.0

M 3308.8

M 3309.2

M 3308.8

M<sub>found</sub> 3309.0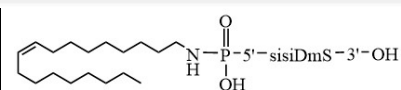M<sub>calcd</sub> 3310.3**(11) MB-L<sub>6</sub>-NH-p-G<sup>m</sup>G<sup>m</sup>C<sup>m</sup>U<sup>m</sup>U<sup>m</sup>G<sup>m</sup>A<sup>m</sup>C<sup>m</sup>A<sup>m</sup>**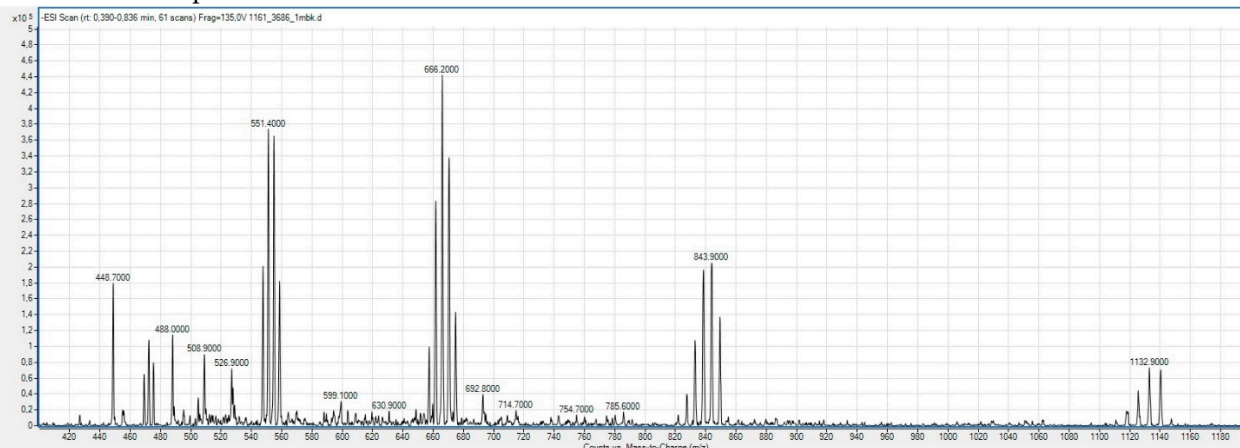

[H6] / 551.4      3314.4 – 1\*23(M<sub>Na+</sub>) + 1\*1(M<sub>H+</sub>) →  
 [H5] / 666.2      3336.0 – 2\*23(M<sub>Na+</sub>) + 2\*1(M<sub>H+</sub>) →  
 [H4] / 843.9      3379.6 – 4\*23(M<sub>Na+</sub>) + 4\*1(M<sub>H+</sub>) →  
 [H3] / 1132.9    3401.7 – 5\*23(M<sub>Na+</sub>) + 5\*1(M<sub>H+</sub>) →

M 3292.4

M 3292.0

M 3291.6

M 3291.7

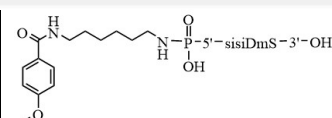

M<sub>found</sub> 3291.9M<sub>calcd</sub> 3293.3**(12)** CH≡C-CH<sub>2</sub>-NH-p-G<sup>m</sup>G<sup>m</sup>C<sup>m</sup>U<sup>m</sup>U<sup>m</sup>G<sup>m</sup>A<sup>m</sup>C<sup>m</sup>A<sup>m</sup>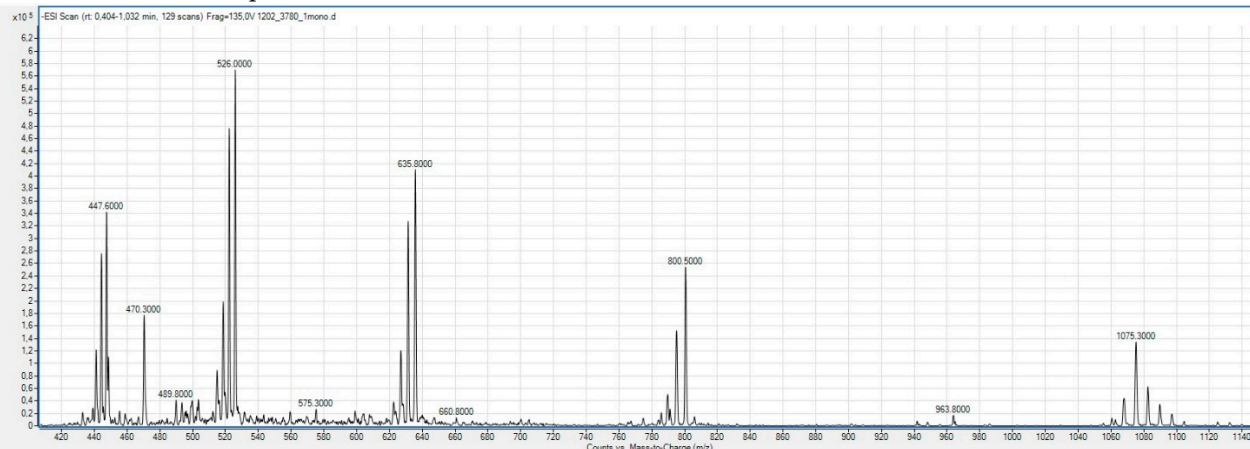

|               |                                                            |          |
|---------------|------------------------------------------------------------|----------|
| [H7] / 447.6  | 3140.2 – 2*23(M <sub>Na+</sub> ) + 2*1(M <sub>H+</sub> ) → | M 3096.2 |
| [H6] / 526.0  | 3162.0 – 3*23(M <sub>Na+</sub> ) + 3*1(M <sub>H+</sub> ) → | M 3096.0 |
| [H5] / 635.8  | 3184.0 – 4*23(M <sub>Na+</sub> ) + 4*1(M <sub>H+</sub> ) → | M 3096.0 |
| [H4] / 800.5  | 3206.0 – 5*23(M <sub>Na+</sub> ) + 5*1(M <sub>H+</sub> ) → | M 3096.0 |
| [H3] / 1075.3 | 3228.9 – 6*23(M <sub>Na+</sub> ) + 6*1(M <sub>H+</sub> ) → | M 3096.9 |

M<sub>found</sub> 3096.2M<sub>calcd</sub> 3098.1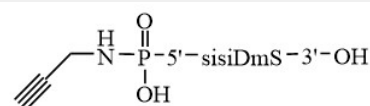**(13)** FAM-click-CH<sub>2</sub>-NH-p-G<sup>m</sup>G<sup>m</sup>C<sup>m</sup>U<sup>m</sup>U<sup>m</sup>G<sup>m</sup>A<sup>m</sup>C<sup>m</sup>A<sup>m</sup>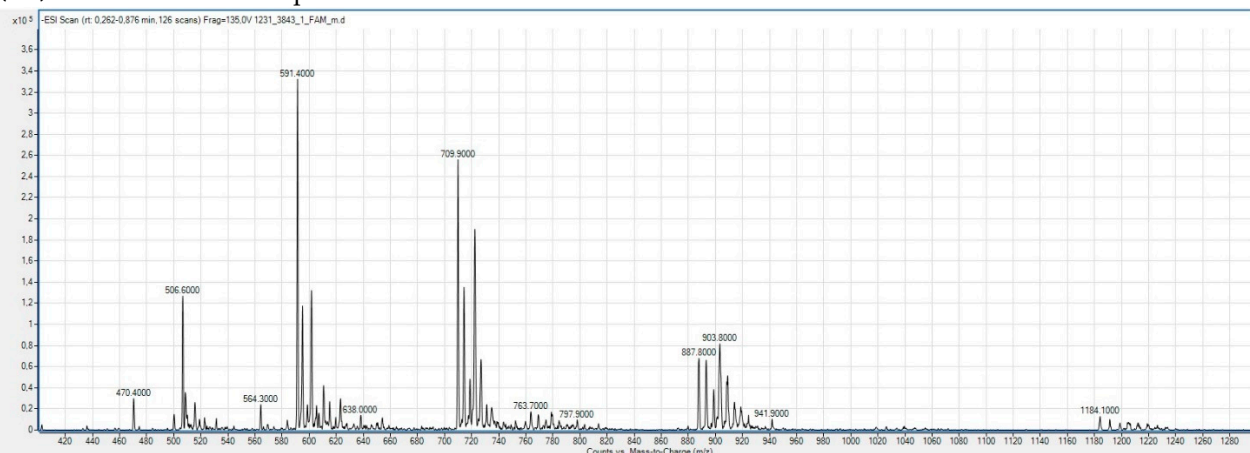

|               |          |          |
|---------------|----------|----------|
| [H7] / 506.6  | 3553.2 → | M 3553.2 |
| [H6] / 591.4  | 3554.4 → | M 3554.4 |
| [H5] / 709.9  | 3554.5 → | M 3554.5 |
| [H4] / 887.8  | 3555.2 → | M 3555.2 |
| [H3] / 1184.1 | 3555.2 → | M 3555.3 |

M<sub>found</sub> 3554.5M<sub>calcd</sub> 3555.5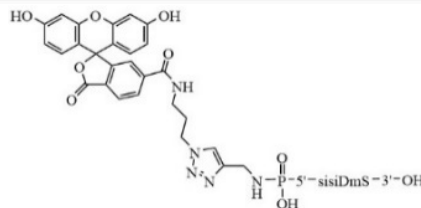



**(14)** MB-L<sub>6</sub>-NH-p-GGCUUGACAAGUUGUAUAUGG<sup>m</sup>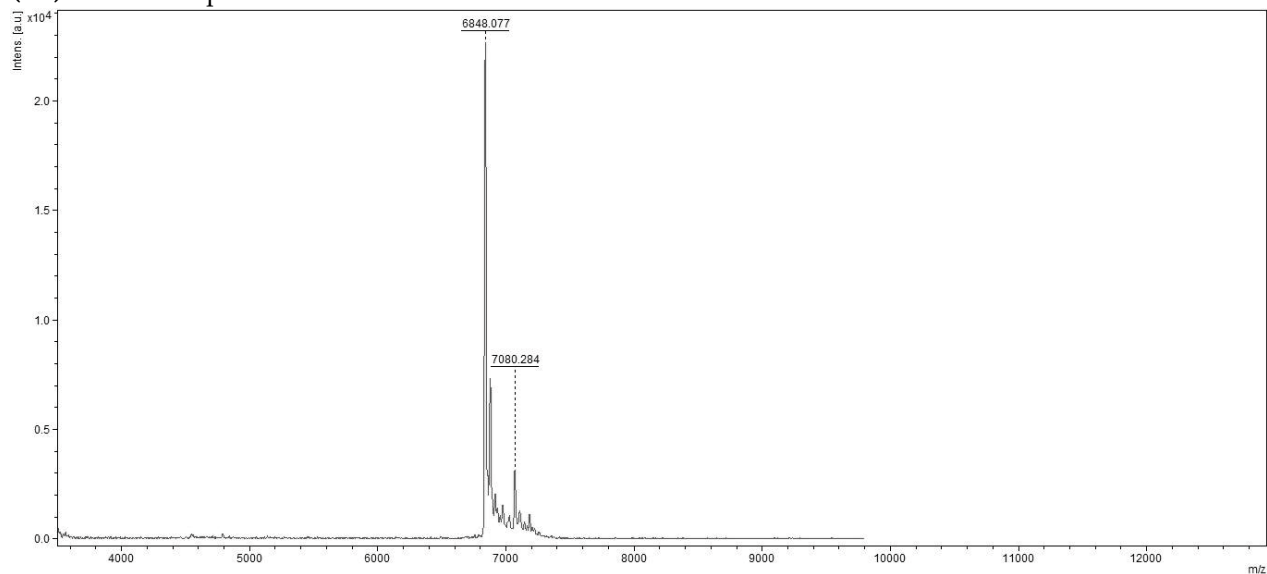

5'-phosphorylated oligonucleotide

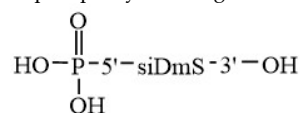M<sub>calcd</sub> 6848.0M<sub>found</sub> 6848.08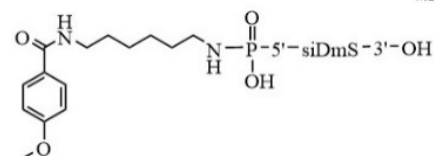M<sub>calcd</sub> 7080.4M<sub>found</sub> 7080.28**(15)** Chol-C(O)-L<sub>6</sub>-NH-p-GGCUUGACAAGUUGUAUAUGG<sup>m</sup>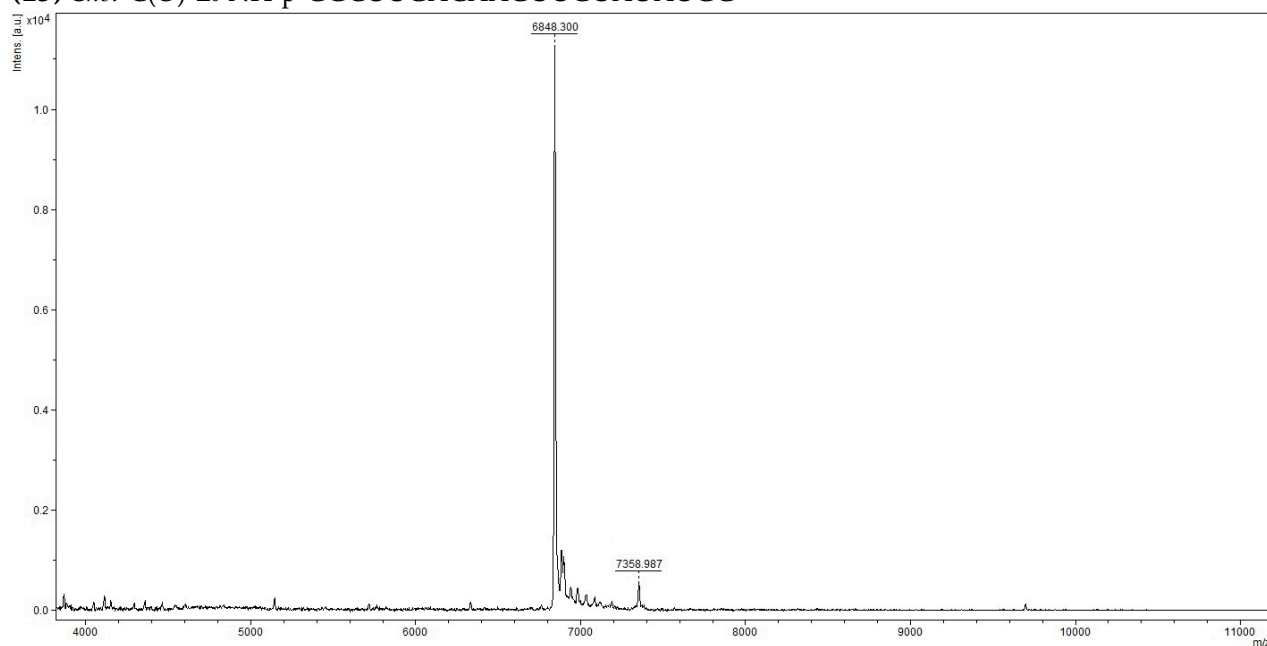

5'-phosphorylated oligonucleotide

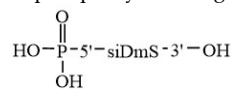M<sub>calcd</sub> 6848.0M<sub>found</sub> 6848.3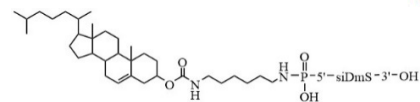M<sub>calcd</sub> 7358.9M<sub>found</sub> 7358.98

**(16)** *Oleyl*-NH-p-GGCUUGACAAGUUGUAUAUGG<sup>m</sup>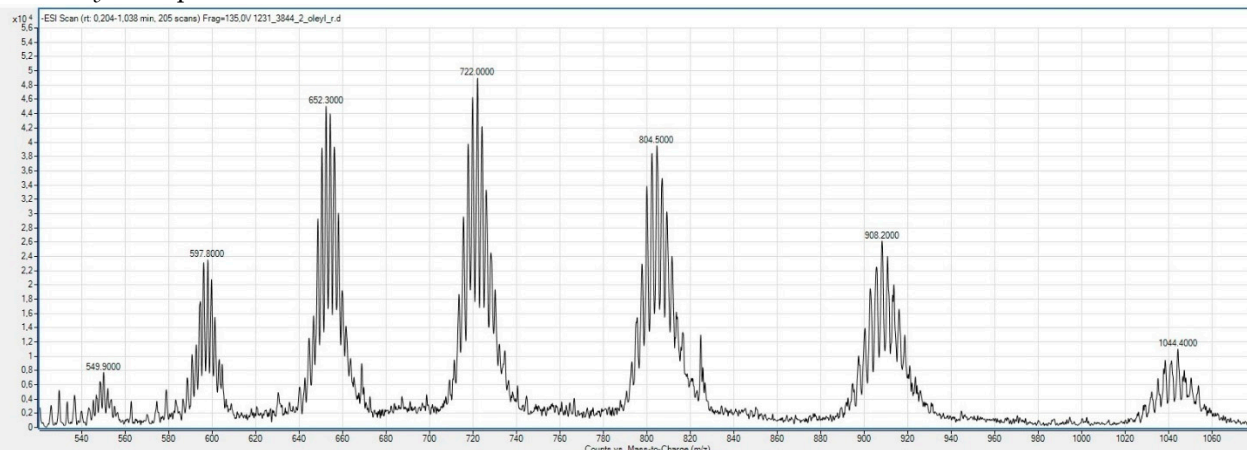

|               |                                                                    |          |
|---------------|--------------------------------------------------------------------|----------|
| [H13] / 549.9 | $7161.7 - 3 \cdot 23(M_{Na^+}) + 3 \cdot 1(M_{H^+}) \rightarrow$   | M 7095.7 |
| [H12] / 597.8 | $7185.6 - 4 \cdot 23(M_{Na^+}) + 4 \cdot 1(M_{H^+}) \rightarrow$   | M 7097.6 |
| [H11] / 652.3 | $7186.3 - 4 \cdot 23(M_{Na^+}) + 4 \cdot 1(M_{H^+}) \rightarrow$   | M 7098.3 |
| [H10] / 722.0 | $7230.0 - 6 \cdot 23(M_{Na^+}) + 6 \cdot 1(M_{H^+}) \rightarrow$   | M 7098.0 |
| [H9] / 804.5  | $7249.5 - 7 \cdot 23(M_{Na^+}) + 7 \cdot 1(M_{H^+}) \rightarrow$   | M 7095.5 |
| [H8] / 908.2  | $7272.6 - 8 \cdot 23(M_{Na^+}) + 8 \cdot 1(M_{H^+}) \rightarrow$   | M 7097.6 |
| [H7] / 1044.4 | $7317.8 - 10 \cdot 23(M_{Na^+}) + 10 \cdot 1(M_{H^+}) \rightarrow$ | M 7097.8 |

M<sub>found</sub> 7097.2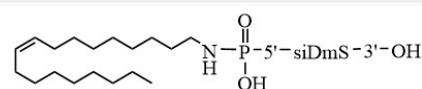M<sub>calcd</sub> 7097.6**(17)** CH≡C-CH<sub>2</sub>-NH-p-GGCUUGACAAGUUGUAUAUGG<sup>m</sup>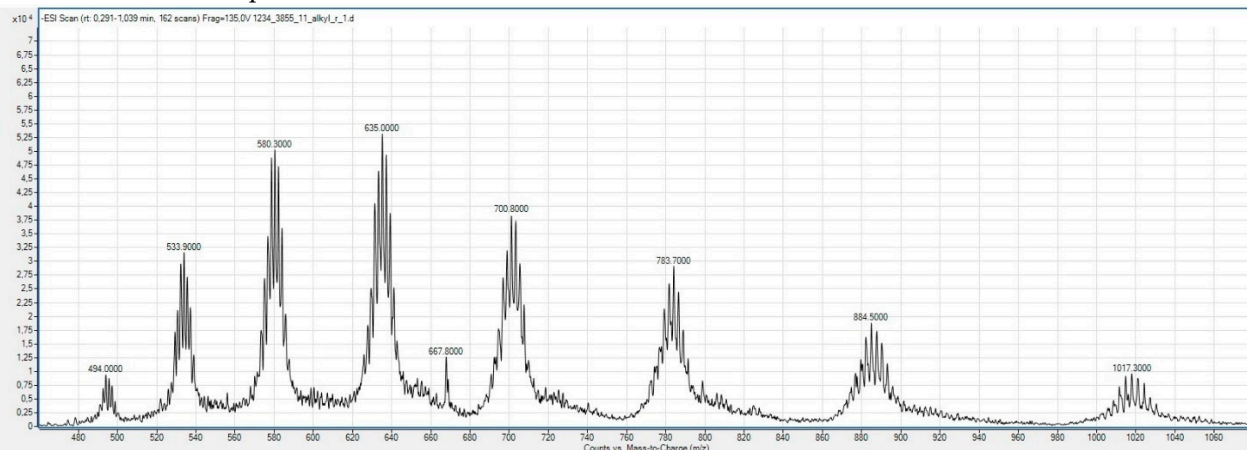

|               |                                                                    |          |
|---------------|--------------------------------------------------------------------|----------|
| [H14] / 494.0 | $6930.0 - 2 \cdot 23(M_{Na^+}) + 2 \cdot 1(M_{H^+}) \rightarrow$   | M 6886.0 |
| [H13] / 533.9 | $6953.7 - 3 \cdot 23(M_{Na^+}) + 3 \cdot 1(M_{H^+}) \rightarrow$   | M 6887.7 |
| [H12] / 580.3 | $6975.6 - 4 \cdot 23(M_{Na^+}) + 4 \cdot 1(M_{H^+}) \rightarrow$   | M 6887.6 |
| [H11] / 635.0 | $6996.0 - 5 \cdot 23(M_{Na^+}) + 5 \cdot 1(M_{H^+}) \rightarrow$   | M 6886.0 |
| [H10] / 700.8 | $7018.0 - 6 \cdot 23(M_{Na^+}) + 6 \cdot 1(M_{H^+}) \rightarrow$   | M 6886.0 |
| [H9] / 783.7  | $7062.3 - 8 \cdot 23(M_{Na^+}) + 8 \cdot 1(M_{H^+}) \rightarrow$   | M 6886.3 |
| [H8] / 884.5  | $7084.0 - 9 \cdot 23(M_{Na^+}) + 9 \cdot 1(M_{H^+}) \rightarrow$   | M 6886.0 |
| [H7] / 1017.3 | $7128.1 - 11 \cdot 23(M_{Na^+}) + 11 \cdot 1(M_{H^+}) \rightarrow$ | M 6886.1 |

M<sub>found</sub> 6886.4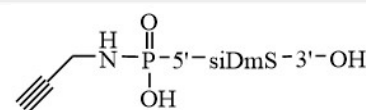M<sub>calcd</sub> 6885.1

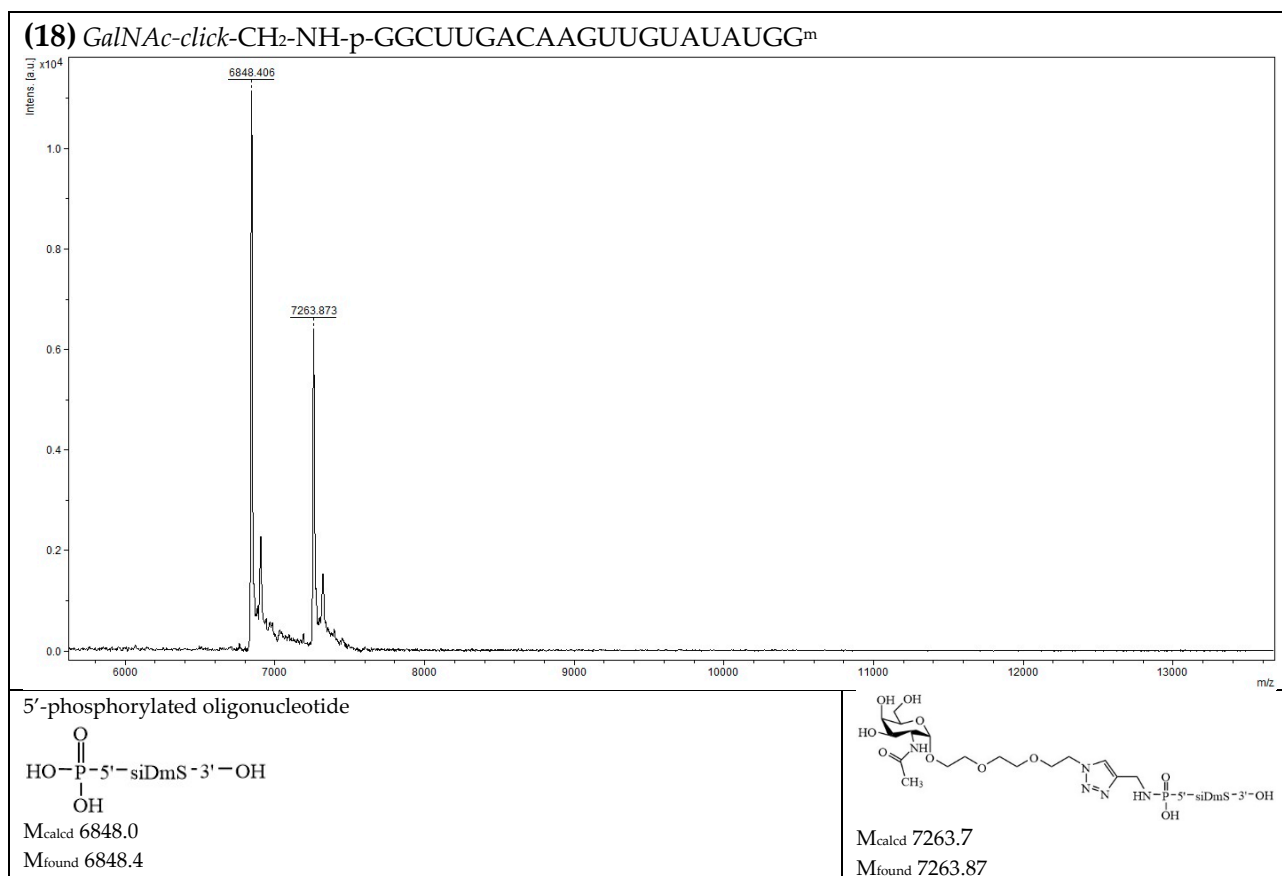

*Chol-*  
*C(O)-*  
*L<sub>6</sub>-*  
*NH-*

Cholesteryl-6-aminohexylcarbamate residue; *Oleyl*-NH-, oleylamine residue; *Pyr*-CH<sub>2</sub>-NH-, pyrenemethylamine residue; *MB*-L<sub>6</sub>-NH-p-, *N*-(6-aminohexyl)-4-methoxybenzamide residue; NH<sub>2</sub>-(CH<sub>2</sub>)<sub>6</sub>-NH-, 1,6-diaminohexane residue; HO-(CH<sub>2</sub>)<sub>3</sub>-NH-, 3-amino-1-propanol residue; CH≡C-CH<sub>2</sub>-NH-, propargylamine residue; *Biot*-, Biotin residue (see also Figure S2); *FAM-click*-CH<sub>2</sub>-NH-, FAM residue with 1,2,3-triazole linker (see also Figure S3); *GalNAc-click*, GalNAc residue with 1,2,3-triazole linker (see also Figure S3); -p-, -P(O)(OH)-; L<sub>6</sub> -, -NH(CH<sub>2</sub>)<sub>6</sub>-; N, ribonucleotide; N<sup>m</sup>, 2'-O-methylribonucleotide; d(N), deoxyribonucleotide.

**Table S3.**  $^1\text{H}$ -NMR spectra of amino containing ligand.

**(A)**  $^1\text{H}$ -NMR spectrum of cholesteryl-6-aminoethylcarbamate (**I**). NMR spectrum was measured with  $\text{CDCl}_3$  as a solvent using AVANCE III 300 NMR spectrometer. The assignment of peaks in the NMR spectrum is given in the Materials and Methods.

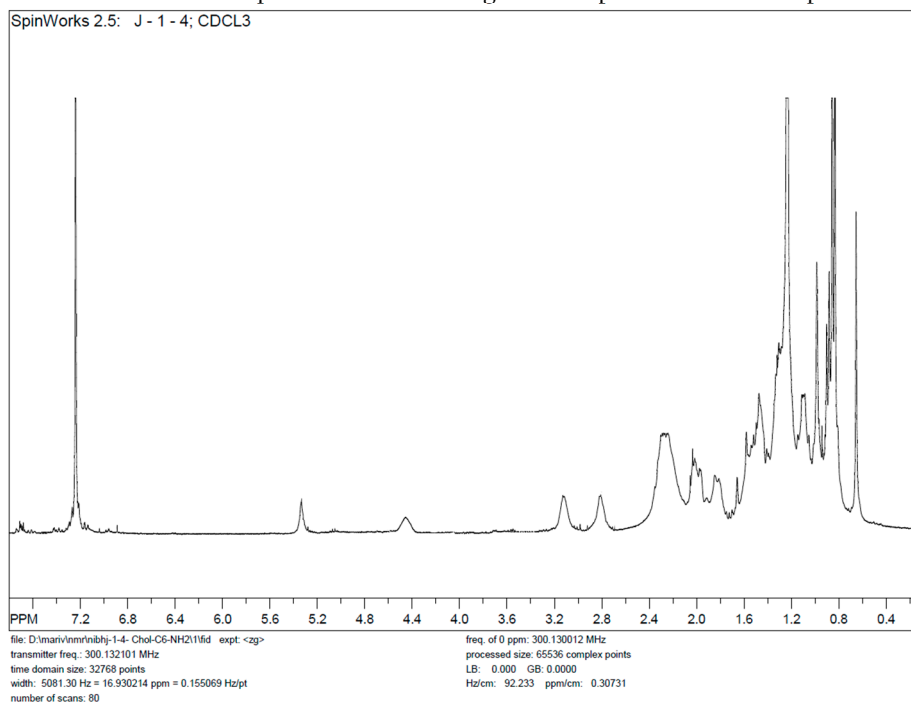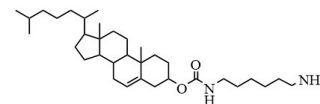

**(B)**  $^1\text{H}$ -NMR spectrum of *N*-Boc-protected *N*-Boc-(6-aminoethyl)-4-methoxybenzamide. NMR spectrum was measured with  $\text{CDCl}_3$  as a solvent using AVANCE III 400 NMR spectrometer. The assignment of peaks in the NMR spectrum is given in the Materials and Methods.

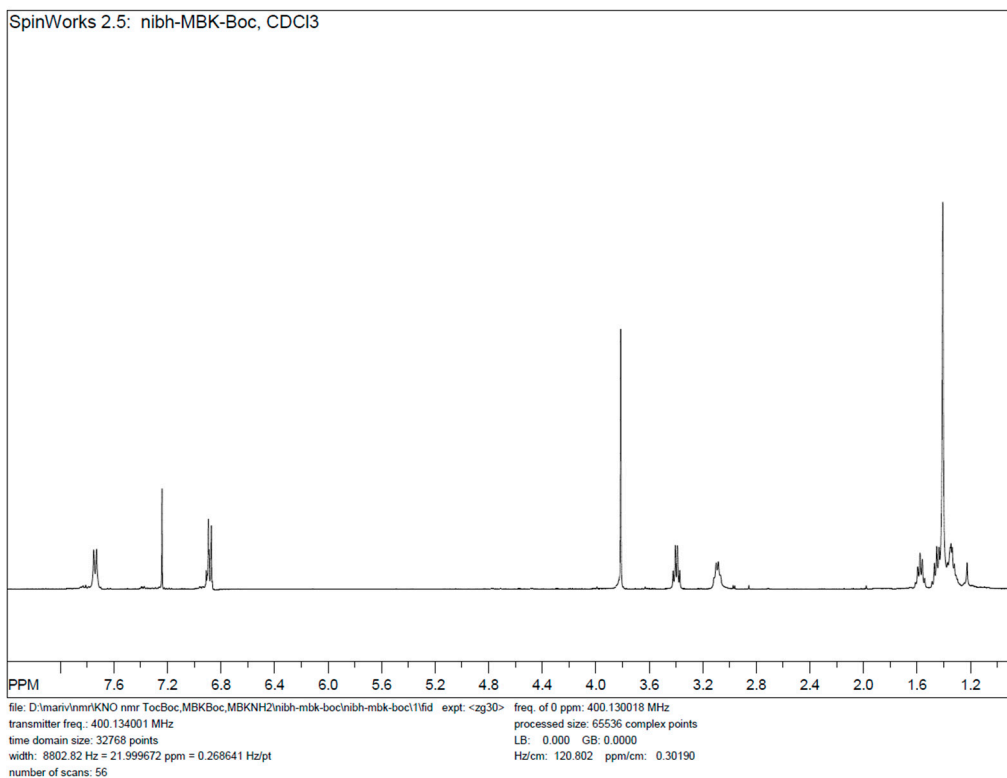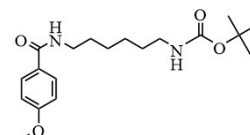

**(C)**  $^1\text{H}$ -NMR spectrum of *N*-(6-aminoethyl)-4-methoxybenzamide (**II**). NMR spectrum was measured with  $\text{CDCl}_3$  as a solvent using AVANCE III 400 NMR spectrometer. The assignment of peaks in the NMR spectrum is given in the Materials and Methods.

SpinWorks 2.5: nibh-MBK-NH2, CDCl3

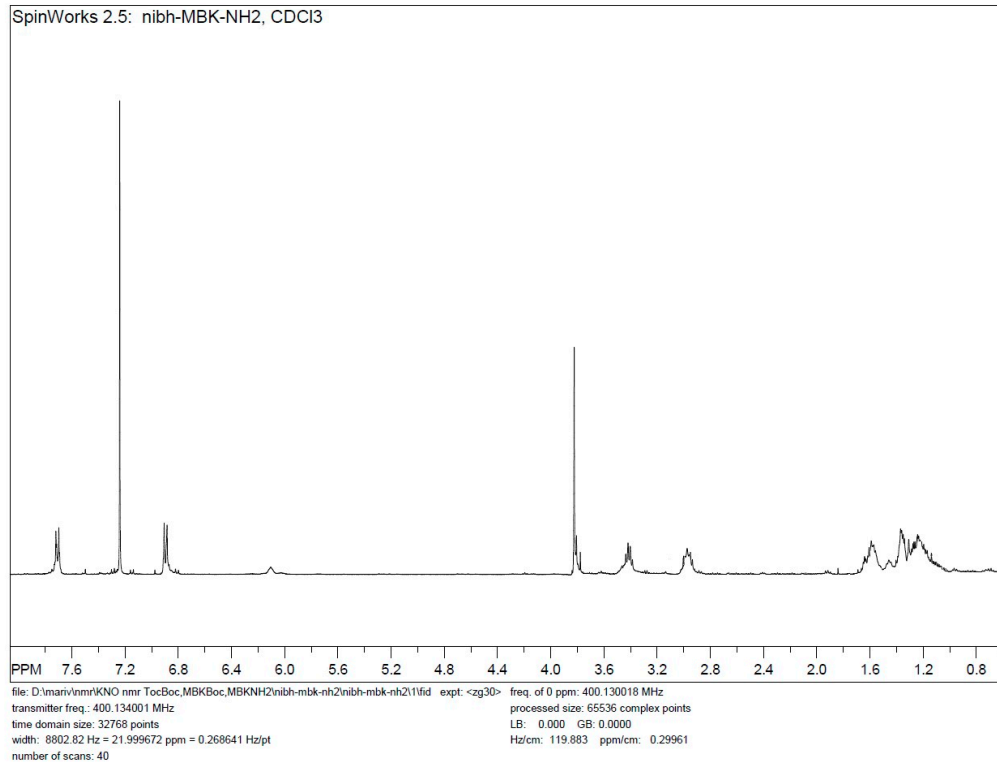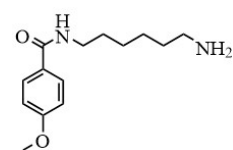

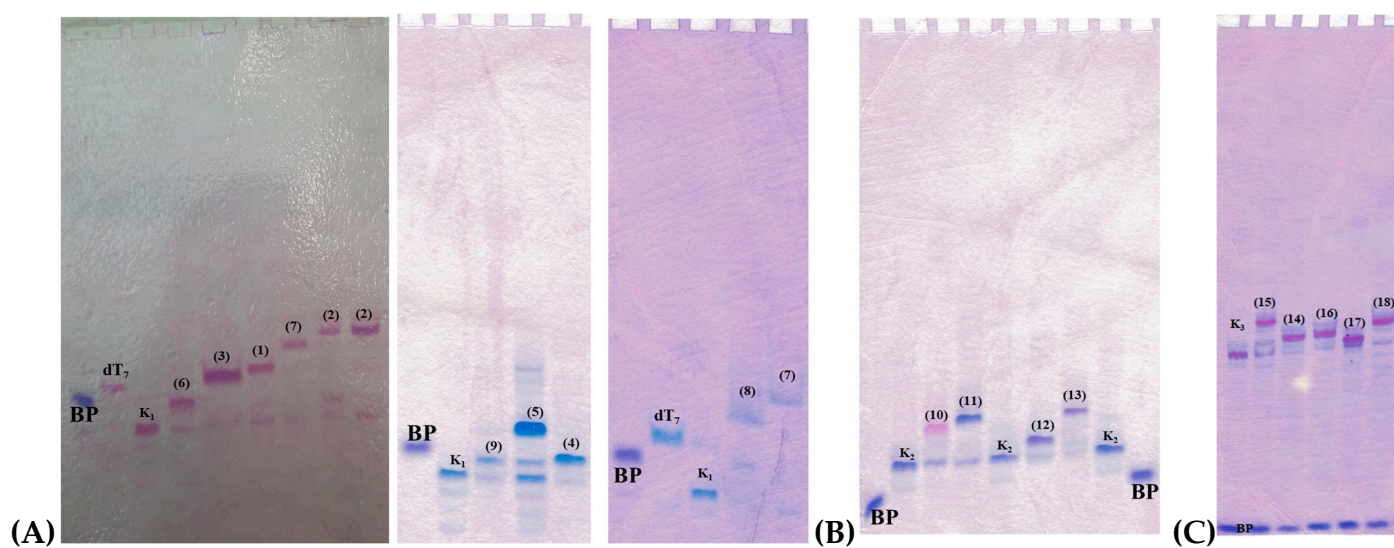

**Figure S4.** Full-size images of electropherograms after PAGE analysis and Stains-all staining for 5'-phosphorylated oligonucleotides and their conjugates (1-18). **(A)** 5'-p-dT<sub>7</sub> (K<sub>1</sub>) and conjugates (1-9); **(B)** 5'-p-siDmS (K<sub>2</sub>) and conjugates (10-13); **(C)** 5'-p-siDmS (K<sub>3</sub>) and conjugates (14-18). Conditions: 15% denaturing PAAG (7M urea, acrylamide/*N,N'*-methylene bis-acrylamide (19/1)) in TBE buffer. Gel stained with "Stains-all". BP – bromophenol blue.



### Experimental Section S1. Automated synthesis of polymer-bound oligonucleotides

Oligodeoxyribonucleotides, oligo(2'-O-methylribonucleotides), oligoribonucleotides and their 5'-phosphate derivatives were synthesized on an automatic ASM-800 synthesizer at 0.4 mmol scale using solid-phase phosphoramidite synthesis protocols optimized for the instrument, with a 3 min coupling step for deoxy phosphoramidites (0.05 M in CH<sub>3</sub>CN), 10 min coupling step for 2'-O-TBDMS protected and CPR phosphoramidites (0.1 M in CH<sub>3</sub>CN), 6 min coupling step for 2'-O-methyl phosphoramidites (0.05 M in CH<sub>3</sub>CN) and 5-ethylthio-1H-tetrazole (0.25 M in CH<sub>3</sub>CN) as an activating agent. A mixture of propionic anhydride (10%, v/v) with 2,6-lutidine (10%, v/v) in THF and N-methylimidazole (16%, v/v) in THF were utilized as capping reagents. The oxidizing agent was 0.02 M iodine in pyridine/water/THF (1/9/90, v/v/v). Dichloroacetic acid (3%, v/v) in CH<sub>2</sub>Cl<sub>2</sub> was used as detritylating reagent.

**Table S4.** Stability of the P-N-bond within the oligonucleotide conjugates (14-16, 18) at different pH values.

| <b>(14)</b> MB-L <sub>6</sub> -NH-p-GGCUUGACAAGUUGUAUAUGG <sup>m</sup> |                                                                                    |
|------------------------------------------------------------------------|------------------------------------------------------------------------------------|
| pH 4.5                                                                 | (14) 1h 2h 4h 6h 24h (*) 1h 2h 4h 6h 24h (14) 1h 2h 4h 6h 24h (*)                  |
|                                                                        | 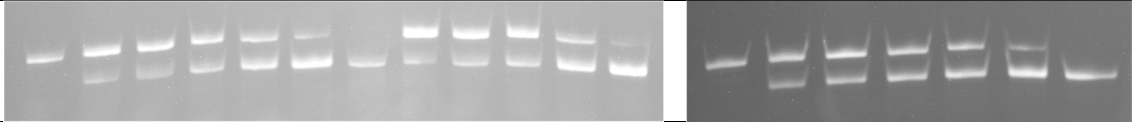 |
| pH 5.2                                                                 | (*) 1h 2h 4h 6h 24h (14) 1h 2h 4h 6h 24h (*) 1h 2h 4h 6h 24h (14)                  |
|                                                                        |  |
| pH 6.0                                                                 | (14) 1h 2h 4h 6h 24h (*) 1h 2h 4h 6h 24h (*) (14) 1h 2h 4h 6h 24h (*)              |
|                                                                        |  |

| <b>(15)</b> Chol-C(O)-L <sub>6</sub> -NH-p-GGCUUGACAAGUUGUAUAUGG <sup>m</sup> |                                                                                      |
|-------------------------------------------------------------------------------|--------------------------------------------------------------------------------------|
| pH 4.5                                                                        | (15) 1h 2h 4h 6h 24h (15) 1h 2h 4h 6h 24h (*) (15) (*) 1h 2h 4h 6h 24h               |
|                                                                               | 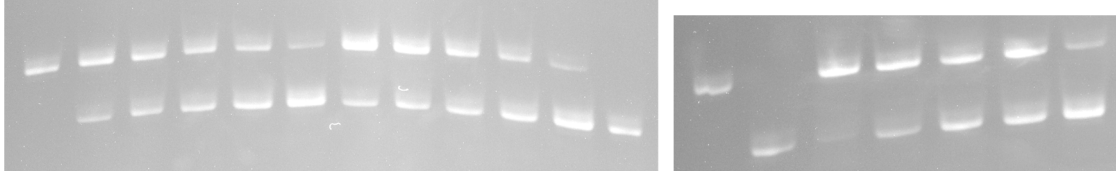 |
| pH 5.2                                                                        | (15) 1h 2h 4h 6h 24h (15) 1h 2h 4h 6h 24h (*) 1h 2h 4h 6h 24h (15)                   |
|                                                                               |  |
| pH 6.0                                                                        | (*) 1h 2h 4h 6h 24h (15) 1h 2h 4h 6h 24h (*) 1h 2h 4h 6h 24h (*) (15)                |
|                                                                               |  |

| <b>(16)</b> <i>Oleyl</i> -NH-p-GGCUUGACAAGUUGUAUAUGG <sup>m</sup> |                                                                                    |    |    |    |    |     |                                                                                    |     |      |    |     |      |                                                                                     |     |    |    |     |      |     |      |     |
|-------------------------------------------------------------------|------------------------------------------------------------------------------------|----|----|----|----|-----|------------------------------------------------------------------------------------|-----|------|----|-----|------|-------------------------------------------------------------------------------------|-----|----|----|-----|------|-----|------|-----|
| pH 4.5                                                            | (16)                                                                               | 1h | 2h | 4h | 6h | 24h | 1h                                                                                 | 2h  | 4h   | 6h | 24h | (16) | (16)                                                                                | (*) | 1h | 2h | 4h  | 6h   | 24h |      |     |
|                                                                   | 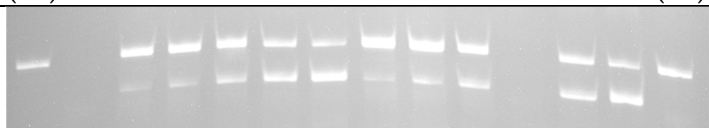 |    |    |    |    |     |                                                                                    |     |      |    |     |      |  |     |    |    |     |      |     |      |     |
| pH 5.2                                                            | (16)                                                                               | 1h | 2h | 4h | 6h | 24h | 1h                                                                                 | 2h  | 4h   | 6h | 24h | (*)  | 1h                                                                                  | 2h  | 4h | 6h | 24h | (16) |     |      |     |
|                                                                   |  |    |    |    |    |     |                                                                                    |     |      |    |     |      |  |     |    |    |     |      |     |      |     |
| pH 6.0                                                            | (*)                                                                                | 1h | 2h | 4h | 6h | 24h | (16)                                                                               | (*) | (16) | 1h | 2h  | 4h   | 6h                                                                                  | 24h | 1h | 2h | 4h  | 6h   | 24h | (16) | (*) |
|                                                                   |   |    |    |    |    |     |  |     |      |    |     |      |  |     |    |    |     |      |     |      |     |

| (18) GalNAc-click-CH <sub>2</sub> -NH-p-GGCUUGACAAGUUGUAUAUGG <sup>m</sup> |                                                                                      |  |  |  |  |  |  |  |  |  |  |  |                                                                                       |  |  |  |  |  |  |  |
|----------------------------------------------------------------------------|--------------------------------------------------------------------------------------|--|--|--|--|--|--|--|--|--|--|--|---------------------------------------------------------------------------------------|--|--|--|--|--|--|--|
| pH 4.5                                                                     | (18) 1h 2h 4h 6h 24h 1h 2h 4h 6h 24h (18)                                            |  |  |  |  |  |  |  |  |  |  |  | (18) 1h 2h 4h 6h 24h (*)                                                              |  |  |  |  |  |  |  |
|                                                                            | 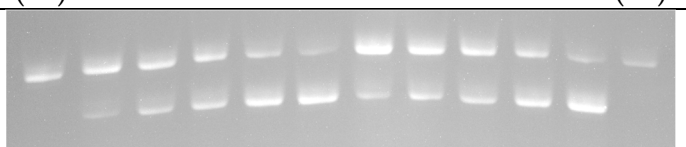 |  |  |  |  |  |  |  |  |  |  |  |  |  |  |  |  |  |  |  |
| pH 5.2                                                                     | (18) 24h 6h 4h 2h 1h (*) 24h 6h 4h 2h 1h                                             |  |  |  |  |  |  |  |  |  |  |  | (*) 1h 2h 4h 6h 24h (18)                                                              |  |  |  |  |  |  |  |
|                                                                            |  |  |  |  |  |  |  |  |  |  |  |  |  |  |  |  |  |  |  |  |
| pH 6.0                                                                     | (*) 1h 2h 4h 6h 24h 1h 2h 4h 6h 24h (18)                                             |  |  |  |  |  |  |  |  |  |  |  | 1h 2h 4h 6h 24h (18)(*)                                                               |  |  |  |  |  |  |  |
|                                                                            |  |  |  |  |  |  |  |  |  |  |  |  |  |  |  |  |  |  |  |  |

(\*) - 5'-phosphorylated oligonucleotide 5'-p-siDmS (5'-p-GGCUUGACAAGUUGUAUAUGG<sup>m</sup>). *MB*-L<sub>6</sub>-NH-p-, *N*-(6-aminohexyl)-4-methoxybenzamide residue; *Chol*-C(O)-L<sub>6</sub>-NH-, cholesteryl-6-aminohexylcarbamate residue; *Oleyl*-NH-, oleylamine residue; *GalNAc-click*, GalNAc residue with 1,2,3-triazole linker; -p-, -P(O)(OH)-; L<sub>6</sub> -, -NH(CH<sub>2</sub>)<sub>6</sub>-; N, ribonucleotide; N<sup>m</sup>, 2'-O-methylribonucleotide. Conditions: 15% denaturing PAAG (7M urea, acrylamide/*N,N'*-methylene bis-acrylamide (19/1)) in TBE buffer. Gel stained with ethidium bromide.
